# Supplementary material for: Dual responsive micelles based on poly[(R)-3-hydroxybutyrate] and poly(2-(di-methylamino)ethyl methacrylate) for effective doxorubicin delivery
Source: Royal Society of Chemistry journal article supplement (doi:10.1039/c3py00096f), 2013-01-01

## Supporting Information

### **Dual Responsive Micelles Based on Poly[(*R*)-3-hydroxybutyrate] and Poly(2-(di-methylamino)ethyl methacrylate) for Effective Doxorubicin Delivery**

*Xian Jun Loh<sup>\*,a,b</sup>, Shi Jie Ong<sup>c</sup>, Yin Ting Tung<sup>c</sup>, Hoi Teng Choo<sup>c</sup>*

<sup>a</sup>Melville Laboratory for Polymer Synthesis, Department of Chemistry, University of Cambridge, Lensfield Road, Cambridge, UK

<sup>b</sup>Institute of Materials Research and Engineering, A\*STAR (Agency for Science, Technology and Research), 3 Research Link, Singapore 117602, Singapore

<sup>c</sup>Singapore Polytechnic, School of Chemical & Life Sciences, 500 Dover Road, Singapore 139651 (Singapore)

\* Corresponding author: E-mail address: [XianJun\\_Loh@scholars.a-star.edu.sg](mailto:XianJun_Loh@scholars.a-star.edu.sg)

**Figure S1.** TGA curves obtained at a heating rate of 20 °C/min under nitrogen atmosphere for (a) PHB-diBr, (b) DHD(15-21-15), (c) DHD(23-21-23), and (d) PDMAEMA.

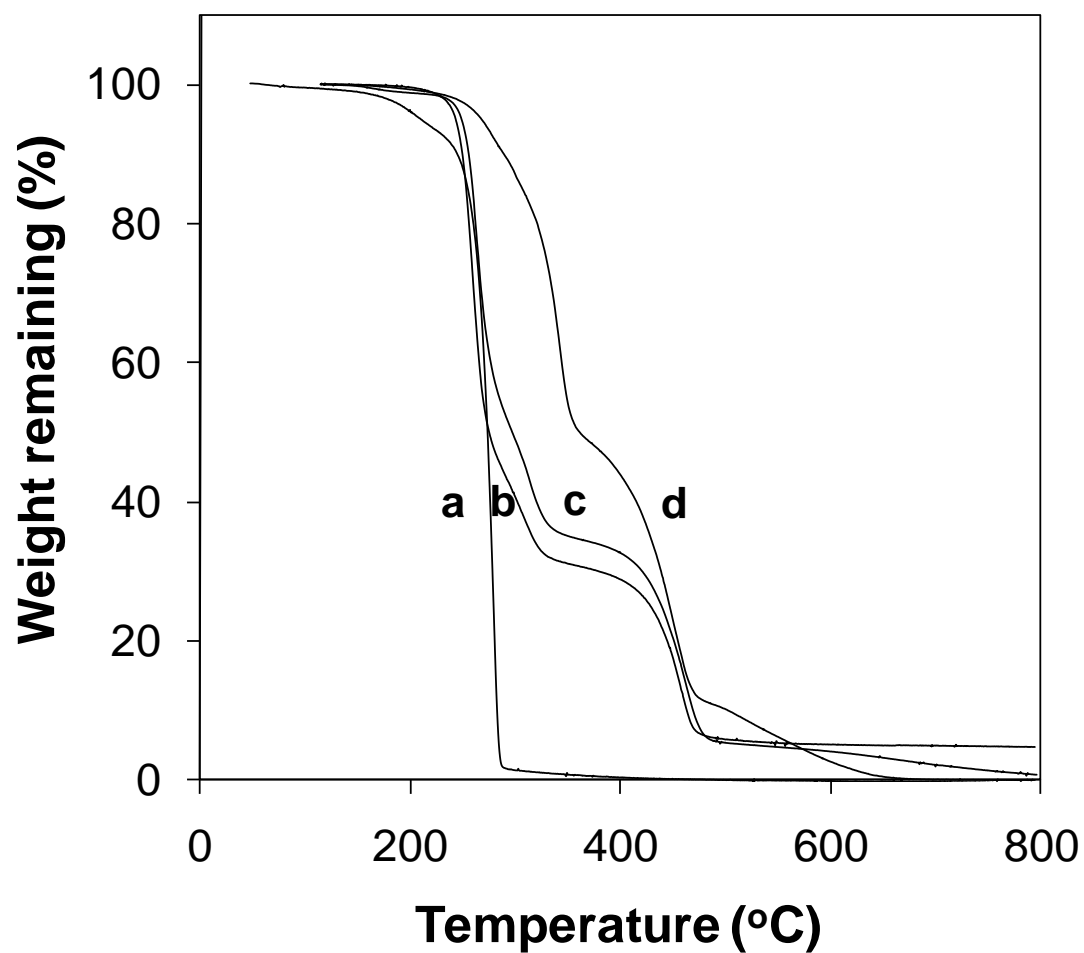

**Figure S2.** Thermoresponsive behavior of PDMAEMA-PHB-PDMAEMA micelles (0.4 mg/mL) (a) DHD(15-21-15), (b) DHD(23-21-23), and (c) PDMAEMA

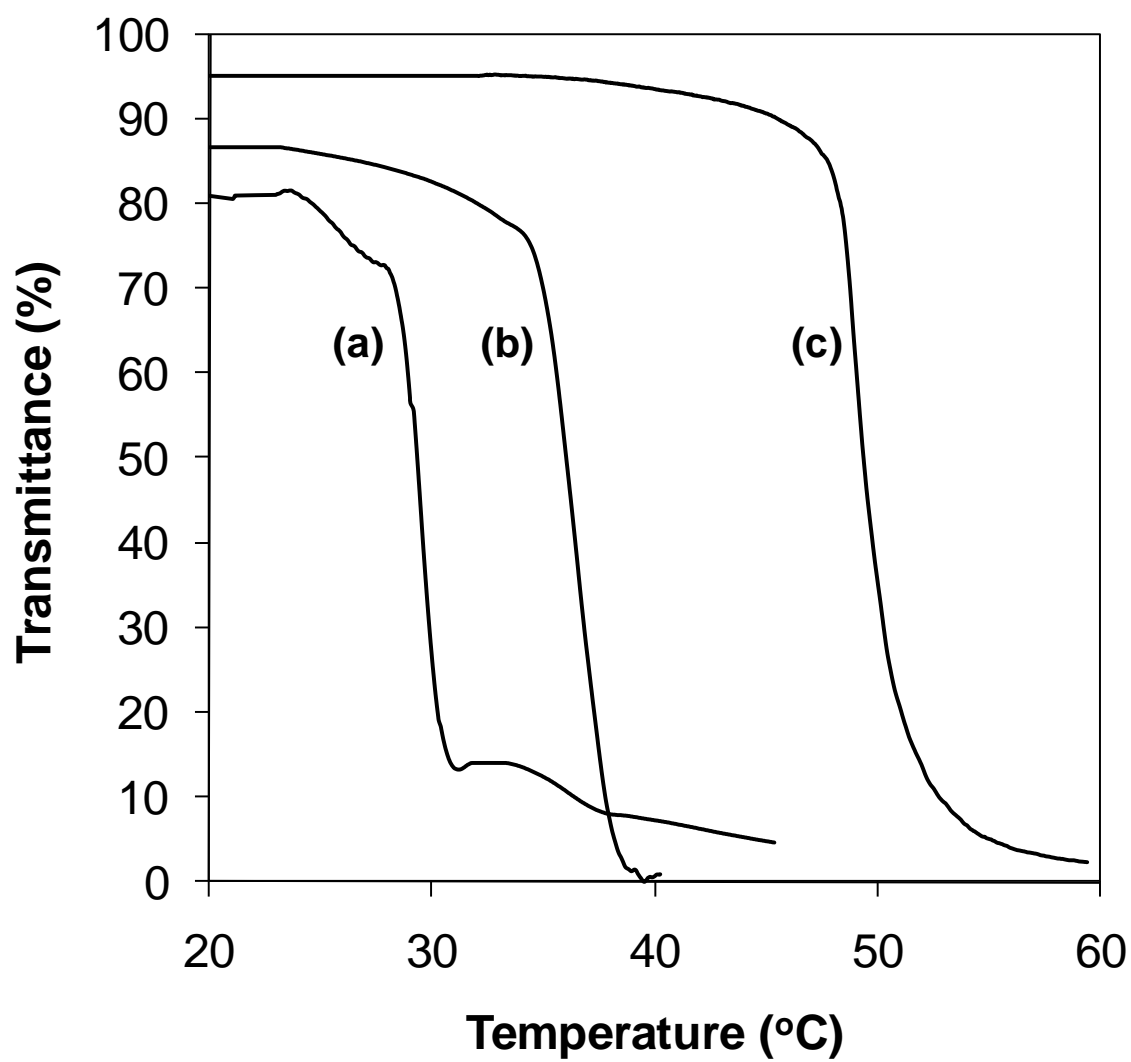

Supplement: c3py00096f.pdf [file c3py00096f.pdf]
